# Supplementary material for: Pyrazoles and Pyrazolines as Anti-Inflammatory Agents
Source: MDPI journal article supplement (doi:10.3390/molecules26113439), 2021-06-05
Supplement: s1 [file s1]

## Supplementary Information

*Computational Studies – Docking Simulation Soybean Lipxygenase*  
Molecular Modeling of the synthesized derivatives in soybean LOX

**Table S1.** Docking scores. Hydrophobic interactions, hydrogen bonds,  $\pi$ -cation interactions and halogen bonds of the synthesized derivatives with different residues

| compd | Docking Scores (kcal/mol) | Hydrophobic interactions                                       | Hydrogen bonds                 | $\pi$ -cation interactions | Halogen bonds |
|-------|---------------------------|----------------------------------------------------------------|--------------------------------|----------------------------|---------------|
| 2a    | -9.6                      | VAL126, VAL520, TYR525, PRO530, ARG533, VAL762, ASP768, TRP772 | THR529                         | -                          | -             |
| 2b    | -9.4                      | VAL126, VAL520, TYR525, PRO530, ASP768                         | LYS526, THR529, ARG767, TYR184 | LYS526                     | PHE144        |
| 2c    | -9.6                      | LEU169, TYR184, ASP243, VAL520, ARG533, ASP768                 |                                | -                          | -             |
| 2d    | -10.3                     | PHE143, LEU169, VAL520, LYS526, PRO530, TRP772                 |                                | ARG182                     | TYR184        |
| 2e    | -10.1                     | VAL126, LEU246, VAL520, ARG533, TRP772                         | ASP768                         |                            | GLU244        |
| 2f    | -10.1                     | VAL126, PHE143, VAL520                                         | ASP768                         |                            |               |
| 2g    | -10.3                     | VAL126, PHE143, VAL520, LYS526                                 | -                              | -                          | ARG182        |
| 2h    | -10.0                     | VAL126, PHE143, VAL520                                         | -                              | -                          | -             |

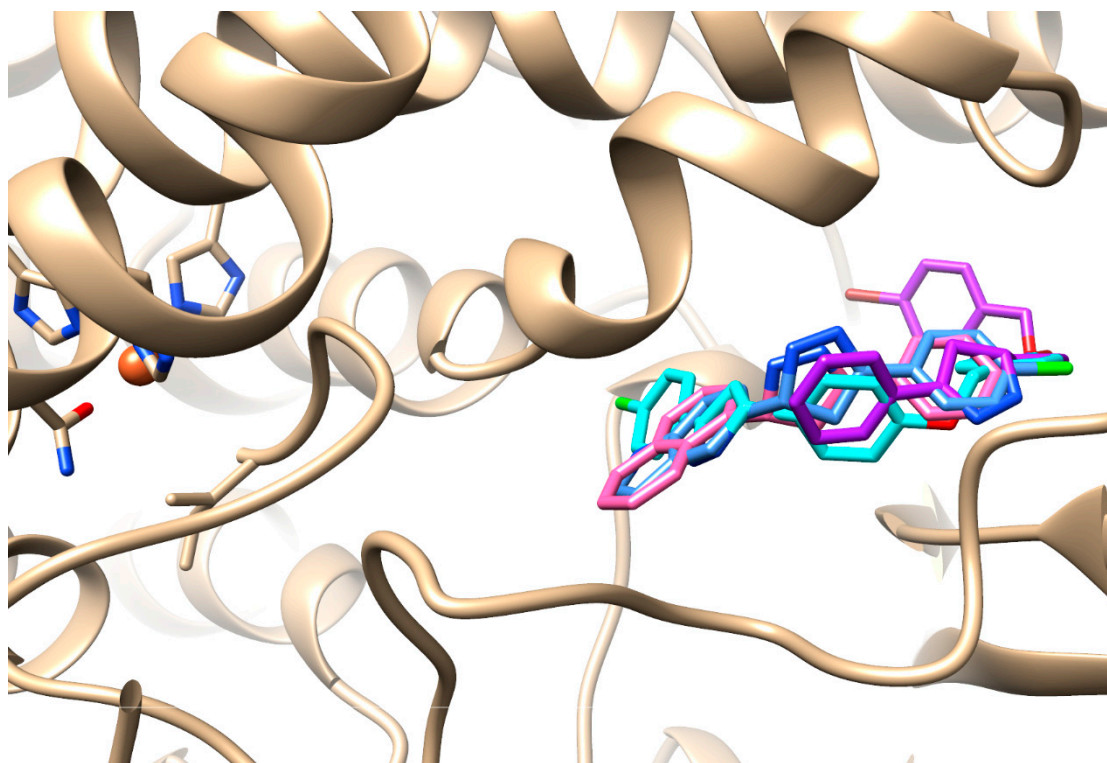

**Figure S1.** Preferred docking poses of pyrazoles (2a [pink], 2b [blue], 2d [purple] and 2e [cyan]) bound to soybean lipoxygenase (LOX-1).

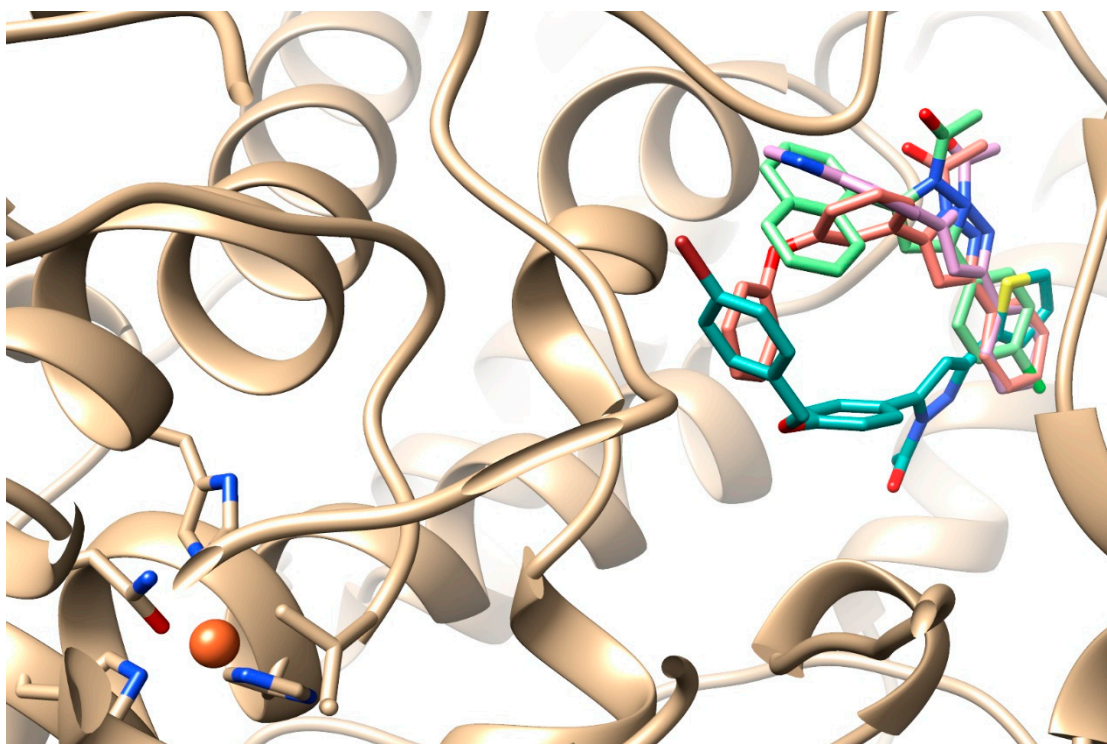

**Figure S2.** Preferred docking poses of pyrazolines (**2c** [light sea green], **2f** [light purple], **2g** [light green] and **2h** [peach pink]) bound to soybean lipoxygenase (LOX-1).
